# Supplementary material
Source: Springer Nature journal article supplement (https://www.springermedizin.de/resource/supplementary/12982_2007_53_MOESM22_ESM.pdf/9604370)
Supplement: MOESM22 [file 9604370]

Russian / Русский

Редакционная статья

## **Открытый доступ для неанглоязычного мира: преодолевая языковой барьер**

Автор: Isaac Chun-Hai FUNG

Реферат

В данной редакционной статье идет речь о проблеме языкового барьера в научном общении, которая имеет место несмотря на недавний успех движения За Открытый Доступ. С целью преодоления языкового барьера для англоязычных журналов предложены четыре подхода: 1) использование рефератов на нескольких языках (перевод обеспечивается авторами) ; 2) открытый перевод Wiki; 3) международный совет редакторов-переводчиков; 4) публикация журналов на других языках. Emerging Themes in Epidemiology объявляет, что с настоящего времени будет принимать рефераты статей или полные переводы статей в виде дополнительных файлов.
